# Supplementary material for: Population Structure and Genetic Diversity Analysis of “Yufen 1” H Line Chickens Using Whole-Genome Resequencing
Source: MDPI journal article supplement (doi:10.3390/life13030793), 2023-03-15
Supplement: s1 [file s1]

Heatmap showing the correlation of gene expression between 14 cell lines: WLH, GS, HBM, HL, HT, HUXU, HX, JH, RIR, ND, RJF, WC, WH, YAO, and YF. The color scale ranges from -49.8 SE (red) to 49.8 SE (blue). The diagonal is white, indicating zero correlation. High positive correlations (blue) are seen between WLH and GS, and between HBM and HX. High negative correlations (red) are seen between WLH and HBM, and between HBM and WLH.

Heatmap of Spearman correlation coefficients between 15 variables. The color scale ranges from -20 SE (red) to 20 SE (blue). The diagonal is white, indicating zero correlation. The heatmap shows a block-like structure of positive and negative correlations.

Heatmap showing the correlation of gene expression between 15 cell lines. The color scale ranges from -22 SE (red) to 22 SE (blue). The cell lines are WLH, GS, HBM, HL, HT, HUXU, HX, JH, RIR, ND, RJF, WC, WH, YAO, and YF. The diagonal is white, indicating zero correlation. High positive correlations (blue) are seen between WLH and GS, and between HBM and HX. High negative correlations (red) are seen between WLH and ND, and between HBM and RIR.
